# Supplementary material
Source: MDPI journal article supplement (https://www.mdpi.com/2304-6767/12/1/20)
Supplement: s1 [file s1]

|              |    |                           |        |                                           |                       |
|--------------|----|---------------------------|--------|-------------------------------------------|-----------------------|
| V3F_modified |    | aatgatacggcgaccaccgagatct |        | <u>acactcttccctacacgacgtctctccgatct</u>   | NNNNCCTACGGGAGGCAGCAG |
| V4R          | 1  | caagcagaagacggcatacagagat | ATCACG | <u>gtgactggagttcagacgtgtgctcttccgatct</u> | GGACTACHVGGGTWTCTAAT  |
| V4R          | 2  | caagcagaagacggcatacagagat | CGATGT | <u>gtgactggagttcagacgtgtgctcttccgatct</u> | GGACTACHVGGGTWTCTAAT  |
| V4R          | 3  | caagcagaagacggcatacagagat | TTAGGC | <u>gtgactggagttcagacgtgtgctcttccgatct</u> | GGACTACHVGGGTWTCTAAT  |
| V4R          | 4  | caagcagaagacggcatacagagat | TGACCA | <u>gtgactggagttcagacgtgtgctcttccgatct</u> | GGACTACHVGGGTWTCTAAT  |
| V4R          | 5  | caagcagaagacggcatacagagat | ACAGTG | <u>gtgactggagttcagacgtgtgctcttccgatct</u> | GGACTACHVGGGTWTCTAAT  |
| V4R          | 6  | caagcagaagacggcatacagagat | GCCAAT | <u>gtgactggagttcagacgtgtgctcttccgatct</u> | GGACTACHVGGGTWTCTAAT  |
| V4R          | 7  | caagcagaagacggcatacagagat | CAGATC | <u>gtgactggagttcagacgtgtgctcttccgatct</u> | GGACTACHVGGGTWTCTAAT  |
| V4R          | 8  | caagcagaagacggcatacagagat | ACTTGA | <u>gtgactggagttcagacgtgtgctcttccgatct</u> | GGACTACHVGGGTWTCTAAT  |
| V4R          | 9  | caagcagaagacggcatacagagat | GATCAG | <u>gtgactggagttcagacgtgtgctcttccgatct</u> | GGACTACHVGGGTWTCTAAT  |
| V4R          | 10 | caagcagaagacggcatacagagat | TAGCTT | <u>gtgactggagttcagacgtgtgctcttccgatct</u> | GGACTACHVGGGTWTCTAAT  |
| V4R          | 11 | caagcagaagacggcatacagagat | GGCTAC | <u>gtgactggagttcagacgtgtgctcttccgatct</u> | GGACTACHVGGGTWTCTAAT  |
| V4R          | 12 | caagcagaagacggcatacagagat | CTTGTA | <u>gtgactggagttcagacgtgtgctcttccgatct</u> | GGACTACHVGGGTWTCTAAT  |
| V4R          | 13 | caagcagaagacggcatacagagat | AGTACG | <u>gtgactggagttcagacgtgtgctcttccgatct</u> | GGACTACHVGGGTWTCTAAT  |
| V4R          | 14 | caagcagaagacggcatacagagat | TCAGTC | <u>gtgactggagttcagacgtgtgctcttccgatct</u> | GGACTACHVGGGTWTCTAAT  |
| V4R          | 15 | caagcagaagacggcatacagagat | TTGAGC | <u>gtgactggagttcagacgtgtgctcttccgatct</u> | GGACTACHVGGGTWTCTAAT  |
| V4R          | 16 | caagcagaagacggcatacagagat | AAGCGA | <u>gtgactggagttcagacgtgtgctcttccgatct</u> | GGACTACHVGGGTWTCTAAT  |
| V4R          | 18 | caagcagaagacggcatacagagat | GGTTGT | <u>gtgactggagttcagacgtgtgctcttccgatct</u> | GGACTACHVGGGTWTCTAAT  |
| V4R          | 19 | caagcagaagacggcatacagagat | TGAGGT | <u>gtgactggagttcagacgtgtgctcttccgatct</u> | GGACTACHVGGGTWTCTAAT  |
| V4R          | 20 | caagcagaagacggcatacagagat | TACCGT | <u>gtgactggagttcagacgtgtgctcttccgatct</u> | GGACTACHVGGGTWTCTAAT  |
| V4R          | 21 | caagcagaagacggcatacagagat | CCAACT | <u>gtgactggagttcagacgtgtgctcttccgatct</u> | GGACTACHVGGGTWTCTAAT  |
| V4R          | 22 | caagcagaagacggcatacagagat | AGAGAG | <u>gtgactggagttcagacgtgtgctcttccgatct</u> | GGACTACHVGGGTWTCTAAT  |
| V4R          | 23 | caagcagaagacggcatacagagat | CACTTG | <u>gtgactggagttcagacgtgtgctcttccgatct</u> | GGACTACHVGGGTWTCTAAT  |
| V4R          | 24 | caagcagaagacggcatacagagat | TCAAGG | <u>gtgactggagttcagacgtgtgctcttccgatct</u> | GGACTACHVGGGTWTCTAAT  |
| V4R          | 25 | caagcagaagacggcatacagagat | AGTGGT | <u>gtgactggagttcagacgtgtgctcttccgatct</u> | GGACTACHVGGGTWTCTAAT  |
| V4R          | 26 | caagcagaagacggcatacagagat | GACACT | <u>gtgactggagttcagacgtgtgctcttccgatct</u> | GGACTACHVGGGTWTCTAAT  |
| V4R          | 27 | caagcagaagacggcatacagagat | CCTTCT | <u>gtgactggagttcagacgtgtgctcttccgatct</u> | GGACTACHVGGGTWTCTAAT  |
| V4R          | 28 | caagcagaagacggcatacagagat | GGATAA | <u>gtgactggagttcagacgtgtgctcttccgatct</u> | GGACTACHVGGGTWTCTAAT  |

|     |    |                          |        |                                           |                      |
|-----|----|--------------------------|--------|-------------------------------------------|----------------------|
| V4R | 29 | caagcagaagacggcatacgagat | CCTTAA | <u>gtgactggagttcagacgtgtgctcttccgatct</u> | GGACTACHVGGGTWTCTAAT |
| V4R | 30 | caagcagaagacggcatacgagat | CAAGAA | <u>gtgactggagttcagacgtgtgctcttccgatct</u> | GGACTACHVGGGTWTCTAAT |
| V4R | 31 | caagcagaagacggcatacgagat | GTTGAA | <u>gtgactggagttcagacgtgtgctcttccgatct</u> | GGACTACHVGGGTWTCTAAT |
| V4R | 32 | caagcagaagacggcatacgagat | TCACAA | <u>gtgactggagttcagacgtgtgctcttccgatct</u> | GGACTACHVGGGTWTCTAAT |
| V4R | 33 | caagcagaagacggcatacgagat | AGTCAA | <u>gtgactggagttcagacgtgtgctcttccgatct</u> | GGACTACHVGGGTWTCTAAT |
| V4R | 34 | caagcagaagacggcatacgagat | CGAATA | <u>gtgactggagttcagacgtgtgctcttccgatct</u> | GGACTACHVGGGTWTCTAAT |
| V4R | 35 | caagcagaagacggcatacgagat | GCTATA | <u>gtgactggagttcagacgtgtgctcttccgatct</u> | GGACTACHVGGGTWTCTAAT |
| V4R | 36 | caagcagaagacggcatacgagat | GAGTTA | <u>gtgactggagttcagacgtgtgctcttccgatct</u> | GGACTACHVGGGTWTCTAAT |
| V4R | 37 | caagcagaagacggcatacgagat | TTGGTA | <u>gtgactggagttcagacgtgtgctcttccgatct</u> | GGACTACHVGGGTWTCTAAT |
| V4R | 38 | caagcagaagacggcatacgagat | AACGTA | <u>gtgactggagttcagacgtgtgctcttccgatct</u> | GGACTACHVGGGTWTCTAAT |
| V4R | 39 | caagcagaagacggcatacgagat | GTACTA | <u>gtgactggagttcagacgtgtgctcttccgatct</u> | GGACTACHVGGGTWTCTAAT |
| V4R | 40 | caagcagaagacggcatacgagat | CATCTA | <u>gtgactggagttcagacgtgtgctcttccgatct</u> | GGACTACHVGGGTWTCTAAT |
| V4R | 41 | caagcagaagacggcatacgagat | TGTAGA | <u>gtgactggagttcagacgtgtgctcttccgatct</u> | GGACTACHVGGGTWTCTAAT |
| V4R | 42 | caagcagaagacggcatacgagat | ATCAGA | <u>gtgactggagttcagacgtgtgctcttccgatct</u> | GGACTACHVGGGTWTCTAAT |
| V4R | 43 | caagcagaagacggcatacgagat | ACATGA | <u>gtgactggagttcagacgtgtgctcttccgatct</u> | GGACTACHVGGGTWTCTAAT |
| V4R | 44 | caagcagaagacggcatacgagat | TAGACA | <u>gtgactggagttcagacgtgtgctcttccgatct</u> | GGACTACHVGGGTWTCTAAT |
| V4R | 45 | caagcagaagacggcatacgagat | GAGAAT | <u>gtgactggagttcagacgtgtgctcttccgatct</u> | GGACTACHVGGGTWTCTAAT |
| V4R | 47 | caagcagaagacggcatacgagat | AGGTAT | <u>gtgactggagttcagacgtgtgctcttccgatct</u> | GGACTACHVGGGTWTCTAAT |
| V4R | 48 | caagcagaagacggcatacgagat | TTGCAT | <u>gtgactggagttcagacgtgtgctcttccgatct</u> | GGACTACHVGGGTWTCTAAT |
| V4R | 49 | caagcagaagacggcatacgagat | TGGATT | <u>gtgactggagttcagacgtgtgctcttccgatct</u> | GGACTACHVGGGTWTCTAAT |
| V4R | 50 | caagcagaagacggcatacgagat | ACCATT | <u>gtgactggagttcagacgtgtgctcttccgatct</u> | GGACTACHVGGGTWTCTAAT |
| V4R | 51 | caagcagaagacggcatacgagat | CTAGTT | <u>gtgactggagttcagacgtgtgctcttccgatct</u> | GGACTACHVGGGTWTCTAAT |
| V4R | 53 | caagcagaagacggcatacgagat | TCTCTT | <u>gtgactggagttcagacgtgtgctcttccgatct</u> | GGACTACHVGGGTWTCTAAT |
| V4R | 54 | caagcagaagacggcatacgagat | GTAAGT | <u>gtgactggagttcagacgtgtgctcttccgatct</u> | GGACTACHVGGGTWTCTAAT |
| V4R | 55 | caagcagaagacggcatacgagat | CAATGT | <u>gtgactggagttcagacgtgtgctcttccgatct</u> | GGACTACHVGGGTWTCTAAT |
| V4R | 57 | caagcagaagacggcatacgagat | ATGACT | <u>gtgactggagttcagacgtgtgctcttccgatct</u> | GGACTACHVGGGTWTCTAAT |
| V4R | 58 | caagcagaagacggcatacgagat | ACTTCT | <u>gtgactggagttcagacgtgtgctcttccgatct</u> | GGACTACHVGGGTWTCTAAT |
| V4R | 59 | caagcagaagacggcatacgagat | CATAAG | <u>gtgactggagttcagacgtgtgctcttccgatct</u> | GGACTACHVGGGTWTCTAAT |

|     |    |                          |        |                                           |                      |
|-----|----|--------------------------|--------|-------------------------------------------|----------------------|
| V4R | 60 | caagcagaagacggcatacgagat | TTCTAG | <u>gtgactggagttcagacgtgtgctcttccgatct</u> | GGACTACHVGGGTWTCTAAT |
| V4R | 61 | caagcagaagacggcatacgagat | AAGATG | <u>gtgactggagttcagacgtgtgctcttccgatct</u> | GGACTACHVGGGTWTCTAAT |
| V4R | 62 | caagcagaagacggcatacgagat | TATGTG | <u>gtgactggagttcagacgtgtgctcttccgatct</u> | GGACTACHVGGGTWTCTAAT |
| V4R | 63 | caagcagaagacggcatacgagat | AATTGG | <u>gtgactggagttcagacgtgtgctcttccgatct</u> | GGACTACHVGGGTWTCTAAT |
| V4R | 64 | caagcagaagacggcatacgagat | TAATCG | <u>gtgactggagttcagacgtgtgctcttccgatct</u> | GGACTACHVGGGTWTCTAAT |
| V4R | 65 | caagcagaagacggcatacgagat | ACTAAC | <u>gtgactggagttcagacgtgtgctcttccgatct</u> | GGACTACHVGGGTWTCTAAT |
| V4R | 66 | caagcagaagacggcatacgagat | TGTTAC | <u>gtgactggagttcagacgtgtgctcttccgatct</u> | GGACTACHVGGGTWTCTAAT |
| V4R | 67 | caagcagaagacggcatacgagat | ATACAC | <u>gtgactggagttcagacgtgtgctcttccgatct</u> | GGACTACHVGGGTWTCTAAT |
| V4R | 68 | caagcagaagacggcatacgagat | CTTATC | <u>gtgactggagttcagacgtgtgctcttccgatct</u> | GGACTACHVGGGTWTCTAAT |
| V4R | 69 | caagcagaagacggcatacgagat | AGATTC | <u>gtgactggagttcagacgtgtgctcttccgatct</u> | GGACTACHVGGGTWTCTAAT |
| V4R | 71 | caagcagaagacggcatacgagat | TGCGAA | <u>gtgactggagttcagacgtgtgctcttccgatct</u> | GGACTACHVGGGTWTCTAAT |
| V4R | 73 | caagcagaagacggcatacgagat | CTGTCA | <u>gtgactggagttcagacgtgtgctcttccgatct</u> | GGACTACHVGGGTWTCTAAT |
| V4R | 74 | caagcagaagacggcatacgagat | GCAGAT | <u>gtgactggagttcagacgtgtgctcttccgatct</u> | GGACTACHVGGGTWTCTAAT |
| V4R | 75 | caagcagaagacggcatacgagat | TCGTGT | <u>gtgactggagttcagacgtgtgctcttccgatct</u> | GGACTACHVGGGTWTCTAAT |
| V4R | 76 | caagcagaagacggcatacgagat | GAACCT | <u>gtgactggagttcagacgtgtgctcttccgatct</u> | GGACTACHVGGGTWTCTAAT |
| V4R | 77 | caagcagaagacggcatacgagat | GTCATG | <u>gtgactggagttcagacgtgtgctcttccgatct</u> | GGACTACHVGGGTWTCTAAT |
| V4R | 78 | caagcagaagacggcatacgagat | GATAGC | <u>gtgactggagttcagacgtgtgctcttccgatct</u> | GGACTACHVGGGTWTCTAAT |
| V4R | 79 | caagcagaagacggcatacgagat | AAGTCC | <u>gtgactggagttcagacgtgtgctcttccgatct</u> | GGACTACHVGGGTWTCTAAT |
| V4R | 80 | caagcagaagacggcatacgagat | ATTGCC | <u>gtgactggagttcagacgtgtgctcttccgatct</u> | GGACTACHVGGGTWTCTAAT |
| V4R | 81 | caagcagaagacggcatacgagat | CCGAGA | <u>gtgactggagttcagacgtgtgctcttccgatct</u> | GGACTACHVGGGTWTCTAAT |
| V4R | 82 | caagcagaagacggcatacgagat | CGCTGA | <u>gtgactggagttcagacgtgtgctcttccgatct</u> | GGACTACHVGGGTWTCTAAT |
| V4R | 83 | caagcagaagacggcatacgagat | GGCACA | <u>gtgactggagttcagacgtgtgctcttccgatct</u> | GGACTACHVGGGTWTCTAAT |
| V4R | 84 | caagcagaagacggcatacgagat | CGTGCA | <u>gtgactggagttcagacgtgtgctcttccgatct</u> | GGACTACHVGGGTWTCTAAT |
| V4R | 85 | caagcagaagacggcatacgagat | GGCCTT | <u>gtgactggagttcagacgtgtgctcttccgatct</u> | GGACTACHVGGGTWTCTAAT |
| V4R | 86 | caagcagaagacggcatacgagat | CCTGGT | <u>gtgactggagttcagacgtgtgctcttccgatct</u> | GGACTACHVGGGTWTCTAAT |
| V4R | 87 | caagcagaagacggcatacgagat | CAGGCT | <u>gtgactggagttcagacgtgtgctcttccgatct</u> | GGACTACHVGGGTWTCTAAT |
| V4R | 88 | caagcagaagacggcatacgagat | GTCGCT | <u>gtgactggagttcagacgtgtgctcttccgatct</u> | GGACTACHVGGGTWTCTAAT |
| V4R | 89 | caagcagaagacggcatacgagat | GCGTAG | <u>gtgactggagttcagacgtgtgctcttccgatct</u> | GGACTACHVGGGTWTCTAAT |

|     |    |                          |        |                                           |                      |
|-----|----|--------------------------|--------|-------------------------------------------|----------------------|
| V4R | 90 | caagcagaagacggcatacgagat | CTGGAG | <u>gtgactggagttcagacgtgtgctcttccgatct</u> | GGACTACHVGGGTWTCTAAT |
| V4R | 91 | caagcagaagacggcatacgagat | CTACGG | <u>gtgactggagttcagacgtgtgctcttccgatct</u> | GGACTACHVGGGTWTCTAAT |
| V4R | 92 | caagcagaagacggcatacgagat | ACACCG | <u>gtgactggagttcagacgtgtgctcttccgatct</u> | GGACTACHVGGGTWTCTAAT |
| V4R | 93 | caagcagaagacggcatacgagat | GTTCCG | <u>gtgactggagttcagacgtgtgctcttccgatct</u> | GGACTACHVGGGTWTCTAAT |
| V4R | 94 | caagcagaagacggcatacgagat | CAGCAC | <u>gtgactggagttcagacgtgtgctcttccgatct</u> | GGACTACHVGGGTWTCTAAT |
| V4R | 95 | caagcagaagacggcatacgagat | CCGTTC | <u>gtgactggagttcagacgtgtgctcttccgatct</u> | GGACTACHVGGGTWTCTAAT |
| V4R | 96 | caagcagaagacggcatacgagat | GCATCC | <u>gtgactggagttcagacgtgtgctcttccgatct</u> | GGACTACHVGGGTWTCTAAT |
| V4R | 97 | caagcagaagacggcatacgagat | TACGCC | <u>gtgactggagttcagacgtgtgctcttccgatct</u> | GGACTACHVGGGTWTCTAAT |
